# Supplementary material
Source: PubMed Central journal article supplement (PMC3872180)
Supplement: 413ab61fef6fb8711908805e9eaa7518_genetics.113.158857-7.pdf [file 413ab61fef6fb8711908805e9eaa7518_genetics.113.158857-7.pdf]

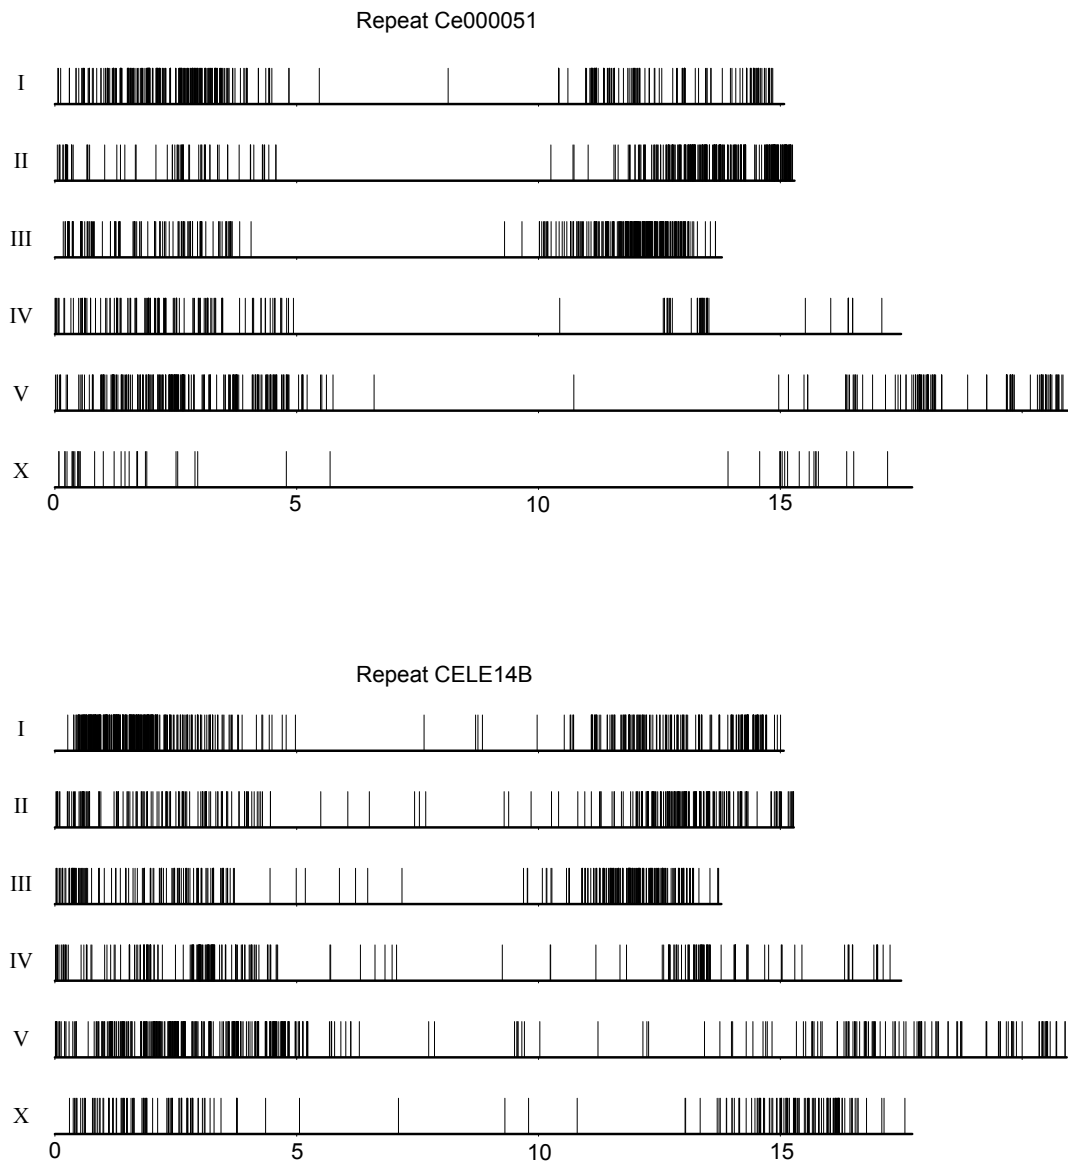

**Figure S2** Two repeat with significantly arm-biased distributions in our studied region are arm-biased across the genome. Each of the 1,901 instances of Repeat Ce000051 and the 2,298 instances of CELE14B are plotted in their physical locations.
