# Supplementary material
Source: PubMed Central journal article supplement (PMC3872180)
Supplement: af156e7b5b6df1d51e2ba01f7566e72d_genetics.113.158857-6.pdf [file af156e7b5b6df1d51e2ba01f7566e72d_genetics.113.158857-6.pdf]

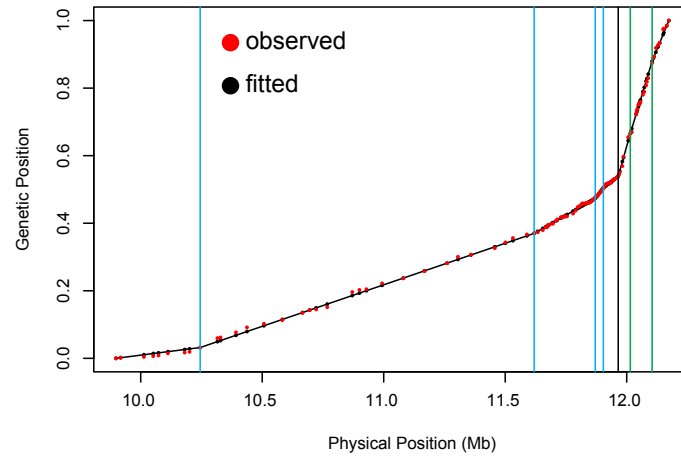

**Figure S3** Constant-rate subdomains. The simplest constant-rate model of the observed crossovers requires at least eight subdomains. The vertical bars mark the seven internal boundaries between domains, estimated by constrained piecewise-linear b-spline regression on the Marey Map. Blue bars bound the domains in the center, green bars in the arm.
